# Supplementary material for: Hypertriglyceridemia is a Major Factor Associated With Elevated Levels of Small Dense LDL Cholesterol in Patients With Metabolic Syndrome
Source: PubMed Central journal article supplement — Ann Lab Med. 2015 Sep 1;35(6):586–94. doi: 10.3343/alm.2015.35.6.586 (PMC4579102; doi:10.3343/alm.2015.35.6.586), 2015-09-01
Supplement: alm-35-586-s002.pdf [file alm-35-586-s002.pdf]

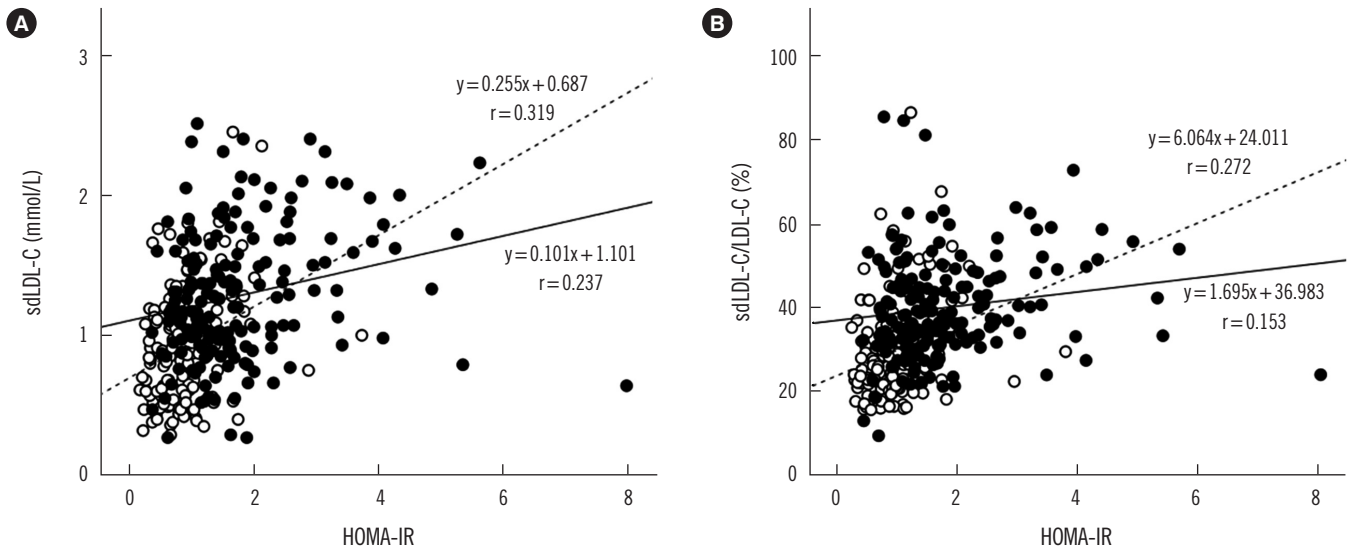

**Supplemental Data Fig. S1.** Scatterplots showing the correlation between the plasma concentration of small dense LDL cholesterol (sdLDL-C) (A) or the sdLDL-C/LDL-C ratio (B) and the homeostasis model assessment of insulin resistance (HOMA-IR) in patients with MetS (●) and healthy population (○). Linear regression curve for the two variables are indicated in solid line (for patients with MetS) or dashed line (for healthy population).
