# Supplementary material for: Hypertriglyceridemia is a Major Factor Associated With Elevated Levels of Small Dense LDL Cholesterol in Patients With Metabolic Syndrome
Source: PubMed Central journal article supplement — Ann Lab Med. 2015 Sep 1;35(6):586–94. doi: 10.3343/alm.2015.35.6.586 (PMC4579102; doi:10.3343/alm.2015.35.6.586), 2015-09-01
Supplement: alm-35-586-s003.pdf [file alm-35-586-s003.pdf]

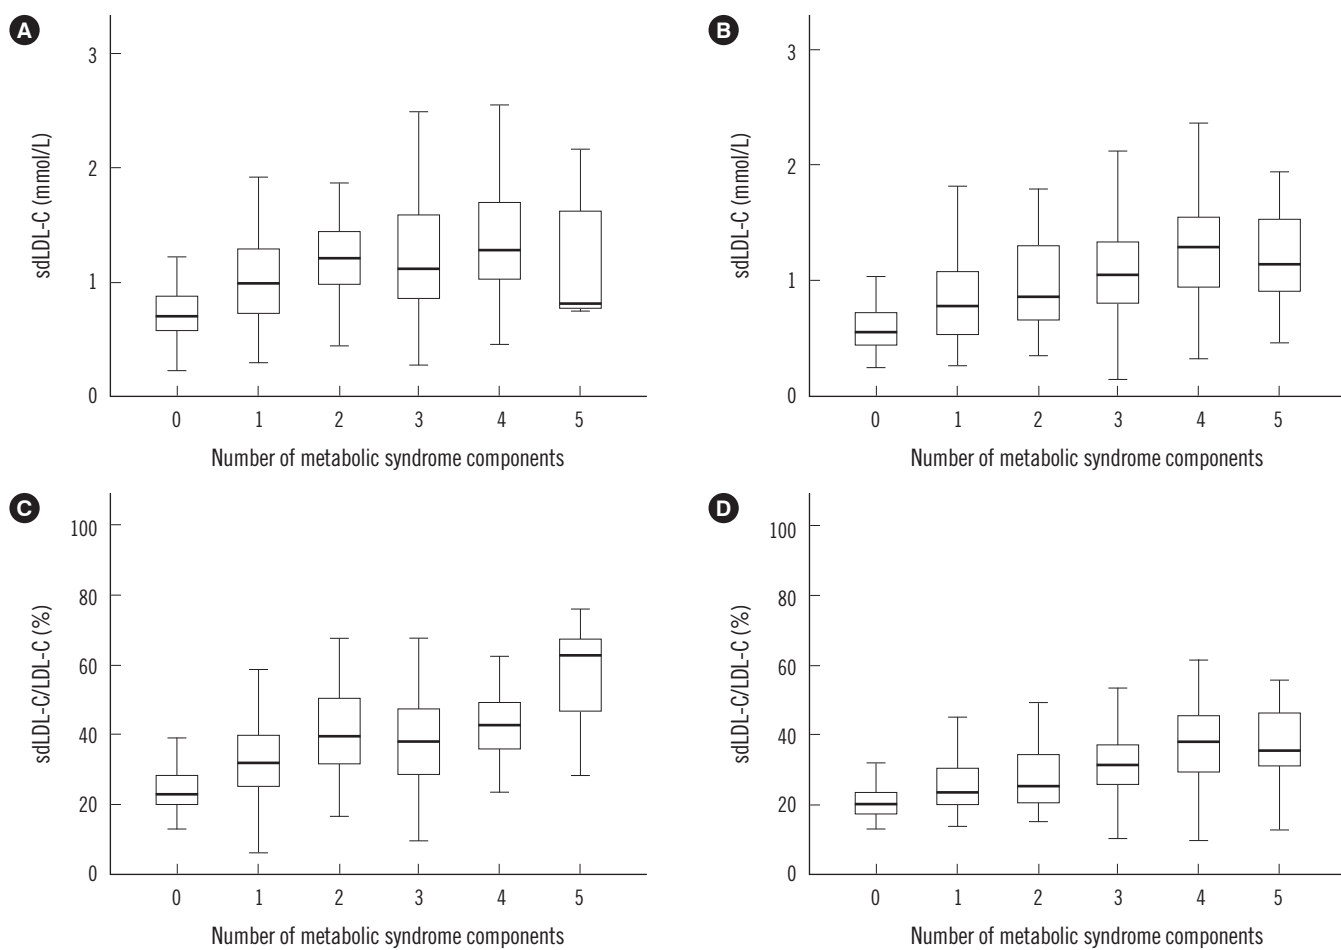

**Supplemental Data Fig. S2.** Progressive increase in the small dense LDL cholesterol (sdLDL-C) concentration in men (A) and women (B), and the sdLDL-C/LDL-C ratio in men (C) and women (D), as a function of the number of metabolic syndrome components ( $P$  for trend < 0.001, for all).
